# Supplementary material for: Prioritization of Candidate Biomarkers for Degenerative Aortic Stenosis through a Systems Biology-Based In-Silico Approach
Source: MDPI journal article supplement (doi:10.3390/jpm12040642), 2022-04-15
Supplement: s1 [file s1]

**Table S2** Effectors defined during the molecular characterization of the “Motives”: (1) calcification; (2) lipoprotein accumulation; (3) inflammation; (4) oxidative stress; (5) endothelial dysfunction; (6) RAA system; (7) hypertrophy; (8) myocardial fibrosis.

| Gene name | Uniprot ID | Reference                                                                                                                                                      | Related motives | Gene name | Uniprot ID | Reference                                                                       | Related motives |
|-----------|------------|----------------------------------------------------------------------------------------------------------------------------------------------------------------|-----------------|-----------|------------|---------------------------------------------------------------------------------|-----------------|
| ACE2      | Q9BYF1     | Lindman BR et al, 2016 [18]; Sverdlov AL et al, 2011 [34]                                                                                                      | 6               | MAP3K7    | O43318     | Nakamura M and Sadoshima J, 2018 [28]                                           | 7, 8            |
| ACTA2     | P62736     | Perrucci GL et al, 2017 [33]                                                                                                                                   | 5               | MAPK1     | P28482     | Pasipoularides A, 2016 [31]                                                     | 7               |
| ADIPOQ    | Q15848     | Kleinauskienė R and Jonkaitienė R, 2018 [14]                                                                                                                   | 3               | MAPK10    | P53779     | Nakamura M and Sadoshima J, 2018 [28]                                           | 7               |
| ADRB1     | P08588     | Katholi RE and Couri DM, 2011 [13]                                                                                                                             | 7               | MAPK11    | Q15759     | Nakamura M and Sadoshima J, 2018 [28]                                           | 7               |
| ADRB2     | P07550     | Adil SO et al, 2016 [1]; Nakamura M and Sadoshima J, 2018 [28]                                                                                                 | 7               | MAPK12    | P53778     | Nakamura M and Sadoshima J, 2018 [28]                                           | 7               |
| AGT       | P01019     | Lindman BR et al, 2016 [18]; Elmariah S and Mohler ER 3rd, 2010 [6]; Mathieu P et al, 2014 [24]; Nakamura M and Sadoshima J, 2018 [28]; Ma ZG et al, 2018 [20] | 6, 7, 8         | MAPK13    | O15264     | Nakamura M and Sadoshima J, 2018 [28]                                           | 7               |
| AGTR1     | P30556     | Pasipoularides A, 2016 [31]; Ma ZG et al, 2018 [20]                                                                                                            | 6, 8            | MAPK14    | Q16539     | Nakamura M and Sadoshima J, 2018 [28]                                           | 7               |
| AGTR2     | P50052     | Lindman BR et al, 2016 [18]; Elmariah S and Mohler ER 3rd, 2010 [6]; Mathieu P et al, 2014 [24]; Katholi RE and Couri DM, 2011 [13]; Ma ZG et al, 2018 [20]    | 6, 7, 8         | MAPK3     | P27361     | Pasipoularides A, 2016 [31]                                                     | 7               |
| AHSG      | P02765     | Kapelouzou A et al, 2015 [12]; Mathieu P and Boulanger MC, 2014 [23]                                                                                           | 1               | MAPK8     | P45983     | Nakamura M and Sadoshima J, 2018 [28]                                           | 7               |
| AKAP6     | Q13023     | Nakamura M and Sadoshima J, 2018 [28]                                                                                                                          | 7               | MAPK9     | P45984     | Nakamura M and Sadoshima J, 2018 [28]                                           | 7               |
| AKT1S1    | Q96B36     | Nakamura M and Sadoshima J, 2018 [28]                                                                                                                          | 7               | MATN2     | O00339     | García-Rodríguez C et al, 2018 [8]                                              | 1               |
| ALPG      | P10696     | Lee SH and Choi JH, 2018 [16]                                                                                                                                  | 1               | MEF2A     | Q02078     | Nakamura M and Sadoshima J, 2018 [28]                                           | 7               |
| APOA1     | P02647     | O'Brien KD et al, 1996 [29]; Mathieu P et al, 2014 [24]                                                                                                        | 2               | MGP       | P08493     | Doris MK et al, 2019 [5]; Mathieu P et al, 2014 [24]                            | 1               |
| APOB      | P04114     | O'Brien KD et al, 1996 [29]; Mathieu P et al, 2014 [24]                                                                                                        | 2               | MLST8     | Q9BVC4     | Nakamura M and Sadoshima J, 2018 [28]                                           | 7               |
| APOE      | P02649     | O'Brien KD et al, 1996 [29]                                                                                                                                    | 2               | MME       | P08473     | Gallo G et al, 2019 [7]                                                         | 3               |
| BAK1      | Q16611     | Pasipoularides A, 2016 [31]                                                                                                                                    | 7               | MMP14     | P50281     | Liu T et al, 2017 [19][19]                                                      | 8               |
| BAX       | Q07812     | Pasipoularides A, 2016 [31]                                                                                                                                    | 7               | MMP2      | P08253     | Lee SH and Choi JH, 2018 [16]; Helske S et al, 2007 [9]; Liu T et al, 2017 [19] | 1, 5            |
| BCL2      | P10415     | Pasipoularides A, 2016 [31]                                                                                                                                    | 7               | MMP9      | P14780     | Lee SH and Choi JH, 2018 [16]; Helske S et al, 2007 [9]                         | 1, 5            |
| BCL2L1    | Q07817     | Pasipoularides A, 2016 [31]                                                                                                                                    | 7               | MSX2      | P35548     | Perrucci GL et al, 2017 [33]                                                    | 1, 5            |
| BGLAP     | P02818     | Cho KI et al, 2018 [3]                                                                                                                                         | 1               | MTOR      | P42345     | Nakamura M and Sadoshima J, 2018 [28]                                           | 7               |
| BGN       | P21810     | García-Rodríguez C et al, 2018 [8]                                                                                                                             | 3               | MYD88     | Q99836     | García-Rodríguez C et al, 2018 [8]; Zhan Q et al, 2017 [41]                     | 1               |
| BMP2      | P12643     | Kapelouzou A et al, 2015 [12]; Lindman BR et al, 2016 [18]; García-Rodríguez C et al, 2018 [8]; Sverdlov AL et al, 2011 [34]                                   | 1               | NFATC1    | O95644     | Lee SH and Choi JH, 2018 [16]; Nakamura M and Sadoshima J, 2018 [28]            | 1, 7            |

| Gene name | Uniprot ID | Reference                                                                                                                    | Related motives | Gene name | Uniprot ID | Reference                                                           | Related motives |
|-----------|------------|------------------------------------------------------------------------------------------------------------------------------|-----------------|-----------|------------|---------------------------------------------------------------------|-----------------|
| BMP4      | P12644     | Kapelouzou A et al, 2015 [12]; Lindman BR et al, 2016 [18]; García-Rodríguez C et al, 2018 [8]; Sverdlov AL et al, 2011 [34] | 1               | NFKB1     | P19838     | Sverdlov AL et al, 2011 [34] ; Lee SH and Choi JH, 2018 [16]        | 1, 3            |
| BMP7      | P18075     | Osman L et al, 2006 [30]                                                                                                     | 1               | NFKB2     | Q00653     | Sverdlov AL et al, 2011 [34] ; Lee SH and Choi JH, 2018 [16]        | 1, 3            |
| CA12      | O43570     | Lindman BR et al, 2016 [18]; Myasoedova VA et al, 2018 [27]                                                                  | 1               | NOS3      | P29474     | Towler DA, 2008 [36]; Mathieu P et al, 2014 [24]                    | 4, 8            |
| CAMK2D    | Q13557     | Nakamura M and Sadoshima J, 2018 [28]                                                                                        | 7               | NOTCH1    | P46531     | Lindman BR et al, 2016 [18]; Elmariah S and Mohler ER 3rd, 2010 [6] | 1               |
| CASP3     | P42574     | Mathieu P and Boulanger MC, 2014 [23]                                                                                        | 1               | NOX1      | Q9Y558     | Towler DA, 2008 [36]                                                | 4               |
| CASP8     | Q14790     | Mathieu P and Boulanger MC, 2014 [23]                                                                                        | 1               | NOX4      | Q9NPH5     | Miller JD et al, 2008 [25]                                          | 4               |
| CAT       | P04040     | Towler DA, 2008 [36]                                                                                                         | 4               | NPPA      | P01160     | Gallo G et al, 2019 [7]                                             | 7, 8            |
| CCL2      | P13500     | Lee SH and Choi JH, 2018 [16]                                                                                                | 3               | NPPB      | P16860     | Gallo G et al, 2019 [7]                                             | 7, 8            |
| CD36      | P16671     | Syväranta S et al, 2014 [35]                                                                                                 | 3               | NPPC      | P23582     | Gallo G et al, 2019 [7]                                             | 1, 8            |
| CDH5      | P33151     | Perrucci GL et al, 2017 [33]                                                                                                 | 5               | NR3C2     | P08235     | Katholi RE and Couri DM, 2011 [13]                                  | 7               |
| CHP1      | Q99653     | Pasipoularides A, 2016 [31]                                                                                                  | 7               | OLR1      | P78380     | Syväranta S et al, 2014 [35]                                        | 3               |
| CMA1      | P23946     | Sverdlov AL et al, 2011 [34] ; Lindman BR et al, 2016 [18]; Helske S et al, 2007 [9]; Legere SA et al 2019 [17]              | 6, 8            | P2RY2     | P41231     | Lindman BR et al, 2016 [18]                                         | 1               |
| COL1A1    | P02452     | Perrucci GL et al, 2017 [33]; Musa TA et al, 2018 [26]; Liu T et al, 2017 [19]                                               | 5, 8            | PDE5A     | O76074     | Nakamura M and Sadoshima J, 2018 [28]                               | 7               |
| COL1A2    | P08123     | Perrucci GL et al, 2017 [33]; Musa TA et al, 2018 [26]; Liu T et al, 2017 [19]                                               | 5, 8            | PDE9A     | O76083     | Nakamura M and Sadoshima J, 2018 [28]                               | 7               |
| COL3A1    | P02461     | Perrucci GL et al, 2017 [33]; Musa TA et al, 2018 [26]; Liu T et al, 2017 [19]                                               | 5, 8            | PECAM1    | P16284     | Perrucci GL et al, 2017 [33]                                        | 5               |
| CSF1      | P09603     | Lee SH and Choi JH, 2018 [16]                                                                                                | 3               | PLA2G7    | Q13093     | Capoulade R et al, 2014 [2]; Mathieu P and Boulanger MC, 2014 [23]  | 1, 2            |
| CTGF      | P29279     | Ma ZG et al, 2018 [20]                                                                                                       | 8               | PLCE1     | Q9P212     | Nakamura M and Sadoshima J, 2018 [28]                               | 7               |
| CTNNB1    | P35222     | Perrucci GL et al, 2017 [33]                                                                                                 | 5               | POSTN     | Q15063     | Martin-Rojas T et al, 2015 [21]                                     | 1               |
| CTSD      | P07339     | Helske S et al, 2007 [9]                                                                                                     | 5               | POU1F1    | P28069     | Mathieu P et al, 2014 [24]; Mathieu P and Boulanger MC, 2014 [23]   | 1               |
| CTSG      | P08311     | Sverdlov AL et al, 2011 [34]                                                                                                 | 6               | PPARGC1A  | Q9UBK2     | Pasipoularides A, 2016 [31]                                         | 4               |
| CTSK      | P43235     | Lee SH and Choi JH, 2018 [16]; Helske S et al, 2007 [9]                                                                      | 1, 5            | PPP3CA    | Q08209     | Nakamura M and Sadoshima J, 2018 [28]                               | 7               |
| CTSL      | P07711     | Lee SH and Choi JH, 2018 [16]                                                                                                | 1               | PPP3R1    | P63098     | Nakamura M and Sadoshima J, 2018 [28]                               | 7               |
| CTSS      | P25774     | Lee SH and Choi JH, 2018 [16]; Helske S et al, 2007 [9]                                                                      | 1, 5            | PRKACA    | P17612     | Mathieu P et al, 2014 [24]                                          | 1               |
| CXCL8     | P10145     | Lee SH and Choi JH, 2018 [16]                                                                                                | 3               | PRKD1     | Q15139     | Nakamura M and Sadoshima J, 2018 [28]                               | 7               |
| CYBB      | P04839     | Towler DA, 2008 [36]; Miller JD et al, 2008 [25]                                                                             | 4               | RELA      | Q04206     | Mathieu P et al, 2014 [24]; Lee SH and Choi JH, 2018 [16]           | 1, 3            |

| Gene name | Uniprot ID | Reference                                                                                                          | Related motives | Gene name | Uniprot ID | Reference                                                                                                                                                 | Related motives |
|-----------|------------|--------------------------------------------------------------------------------------------------------------------|-----------------|-----------|------------|-----------------------------------------------------------------------------------------------------------------------------------------------------------|-----------------|
| CYC1      | P08574     | Pasipoularides A, 2016 [31]                                                                                        | 7               | RELB      | Q01201     | Sverdlov AL et al, 2011 [34] ; Lee SH and Choi JH, 2018 [16]                                                                                              | 1, 3            |
| DEPTOR    | Q8TB45     | Nakamura M and Sadoshima J, 2018 [28]                                                                              | 7               | RETN      | Q9HD89     | Mathieu P and Boulanger MC, 2014 [23][23]                                                                                                                 | 1, 4            |
| DPP4      | P27487     | Cho KI et al, 2018 [3][3]                                                                                          | 1               | RPS6KB1   | P23443     | Nakamura M and Sadoshima J, 2018 [28]                                                                                                                     | 7               |
| EDN1      | P05305     | Peltonen T et al, 2008 [32]; Nakamura M and Sadoshima J, 2018 [28]; Liu T et al, 2017 [19]; Ma ZG et al, 2018 [20] | 5, 7, 8         | RPTOR     | Q8N122     | Nakamura M and Sadoshima J, 2018 [28]                                                                                                                     | 7               |
| EIF4E     | P06730     | Nakamura M and Sadoshima J, 2018 [28]                                                                              | 7               | RUNX2     | Q13950     | Perrucci GL et al, 2017 [33]                                                                                                                              | 1               |
| EIF4EBP1  | Q13541     | Nakamura M and Sadoshima J, 2018 [28]                                                                              | 7               | SELE      | P16581     | Cowell SJ et al, 2014 [4]; Lee SH and Choi JH, 2018 [16]                                                                                                  | 3, 5            |
| ELN       | P15502     | Helske S et al, 2007 [9]                                                                                           | 5               | SIRT1     | Q96EB6     | Mathieu P and Boulanger MC, 2014 [23]                                                                                                                     | 4               |
| ENPP1     | P22413     | Mathieu P et al, 2014 [24]                                                                                         | 1               | SMAD2     | Q15796     | Nakamura M and Sadoshima J, 2018 [28]; Ma ZG et al, 2018 [20]                                                                                             | 8               |
| ENPP2     | Q13822     | Lindman BR et al, 2016 [18]                                                                                        | 1               | SMAD3     | P84022     | Nakamura M and Sadoshima J, 2018 [28]; Ma ZG et al, 2018 [20]                                                                                             | 8               |
| EPAC1     | O95398     | Nakamura M and Sadoshima J, 2018 [28]                                                                              | 7               | SOD1      | P00441     | Towler DA, 2008 [36]                                                                                                                                      | 4               |
| FGF1      | P05230     | Katholi RE and Couri DM, 2011 [13]; Liu T et al, 2017 [19]                                                         | 7, 8            | SOD2      | P04179     | Towler DA, 2008 [36]                                                                                                                                      | 4               |
| GATA4     | P43694     | Nakamura M and Sadoshima J, 2018 [28]                                                                              | 7               | SOD3      | P08294     | Towler DA, 2008 [36]                                                                                                                                      | 4               |
| GRK2      | P25098     | Nakamura M and Sadoshima J, 2018 [28]                                                                              | 7               | SP7       | Q8TDD2     | Lee SH and Choi JH, 2018 [16]                                                                                                                             | 1               |
| GRK5      | P34947     | Nakamura M and Sadoshima J, 2018 [28]                                                                              | 7               | SPP1      | P10451     | Lee SH and Choi JH, 2018 [16]; Cho KI et al, 2018 [3]                                                                                                     | 1               |
| HDAC1     | Q13547     | Nakamura M and Sadoshima J, 2018 [28]                                                                              | 7               | TGFB1     | P01137     | Osman L et al, 2006 [30]; Perrucci GL et al, 2017 [33]; Katholi RE and Couri DM, 2011 [13]; Nakamura M and Sadoshima J, 2018 [28]; Ma ZG et al, 2018 [20] | 1, 5, 7, 8      |
| HDAC2     | Q92769     | Nakamura M and Sadoshima J, 2018 [28]                                                                              | 7               | TGFB3     | P10600     | Osman L et al, 2006 [30]                                                                                                                                  | 1               |
| HDAC3     | O15379     | Nakamura M and Sadoshima J, 2018 [28]                                                                              | 7               | TGFBR1    | P36897     | Nakamura M and Sadoshima J, 2018 [28]; Ma ZG et al, 2018 [20]                                                                                             | 8               |
| HDAC4     | P56524     | Nakamura M and Sadoshima J, 2018 [28]                                                                              | 7               | TGFBR2    | P37173     | Nakamura M and Sadoshima J, 2018 [28]; Ma ZG et al, 2018 [20]                                                                                             | 8               |
| HDAC5     | Q9UQL6     | Nakamura M and Sadoshima J, 2018 [28]                                                                              | 7               | TIMP1     | P01033     | Helske S et al, 2007 [9]                                                                                                                                  | 5               |
| HDAC9     | Q9UKV0     | Nakamura M and Sadoshima J, 2018 [28]                                                                              | 7               | TIMP2     | P16035     | Helske S et al, 2007 [9]                                                                                                                                  | 5               |
| HMGB1     | P09429     | Weber C and Noels H, 2011 [38]                                                                                     | 3               | TIMP3     | P35625     | Helske S et al, 2007 [9]                                                                                                                                  | 5               |
| IBSP      | P21815     | Kaden JJ et al, 2004 [11]                                                                                          | 1               | TIMP4     | Q99727     | Helske S et al, 2007 [9]                                                                                                                                  | 5               |
| ICAM1     | P05362     | Venardos N et al, 2014 [37]; Lee SH and Choi JH, 2018 [16]                                                         | 3, 5            | TLR2      | O60603     | Lindman BR et al, 2016 [18]; Elmariah S and Mohler ER 3rd, 2010 [6]; García-Rodríguez C et al, 2018 [8]                                                   | 1, 3            |

| Gene name | Uniprot ID | Reference                                                                         | Related motives | Gene name | Uniprot ID | Reference                                                                                                                         | Related motives |
|-----------|------------|-----------------------------------------------------------------------------------|-----------------|-----------|------------|-----------------------------------------------------------------------------------------------------------------------------------|-----------------|
| IGF1      | P05019     | Katholi RE and Couri DM, 2011 [13]                                                | 7               | TLR3      | O15455     | Lee SH and Choi JH, 2018 [16]                                                                                                     | 1, 3            |
| IL10      | P22301     | Kolasa-Trela R et al, 2017 [15]                                                   | 3               | TLR4      | O00206     | Lindman BR et al, 2016 [18]; Elmariah S and Mohler ER 3rd, 2010 [6]; García-Rodríguez C et al, 2018 [8]                           | 1, 3            |
| IL1A      | P01583     | Liu T et al, 2017 [19]                                                            | 8               | TNC       | P24821     | Kapelouzou A et al, 2015 [12]; Yetkin E, Waltenberger J, 2009 [39]                                                                | 1               |
| IL1B      | P01584     | Lee SH and Choi JH, 2018 [16]; Liu T et al, 2017 [19]                             | 3, 8            | TNF       | P01375     | Mathieu P et al, 2014 [24]; Lee SH and Choi JH, 2018 [16]; Mathieu P et al, 2014 [24]; Lin CP et al, 2015; Liu T et al, 2017 [19] | 1, 2, 3, 4, 8   |
| IL6       | P05231     | Mathieu P et al, 2015 [22]; Lee SH and Choi JH, 2018 [16]; Liu T et al, 2017 [19] | 1, 3, 8         | TNFRSF11A | Q9Y6Q6     | Yip CY and Simmons CA, 2011 [40]; Izquierdo-Gómez MM et al, 2017 [10]                                                             | 1               |
| INS       | P01308     | Katholi RE and Couri DM, 2011 [13]                                                | 7               | TNFRSF11B | O00300     | Yip CY and Simmons CA, 2011 [40]; Izquierdo-Gómez MM et al, 2017 [10]                                                             | 1               |
| KNG1      | P01042     | Gallo G et al, 2019 [7]                                                           | 3               | TNFSF11   | O14788     | Yip CY and Simmons CA, 2011 [40]; Izquierdo-Gómez MM et al, 2017 [10]                                                             | 1               |
| LEP       | P41159     | Kolasa-Trela R et al, 2011                                                        | 4, 5, 7         | VCAM1     | P19320     | Cowell SJ et al, 2014; Lee SH and Choi JH, 2018 [16]                                                                              | 3, 5            |
| LOX       | P28300     | Liu T et al, 2017 [19]                                                            | 8               | VIM       | P08670     | Perrucci GL et al, 2017 [33]                                                                                                      | 5               |
| LPA       | P08519     | Lindman BR et al, 2016 [18]; Mathieu P et al, 2014 [24]                           | 2               | VWF       | P04275     | Perrucci GL et al, 2017 [33]                                                                                                      | 5               |
| MAP2K3    | P46734     | Nakamura M and Sadoshima J, 2018 [28]                                             | 7               | WNT11     | O96014     | Lee SH and Choi JH, 2018 [16]; Cho KI et al, 2018 [3]                                                                             | 1               |
| MAP2K4    | P45985     | Nakamura M and Sadoshima J, 2018 [28]                                             | 7               | WNT3A     | P56704     | Lee SH and Choi JH, 2018 [16]                                                                                                     | 1               |
| MAP2K6    | P52564     | Nakamura M and Sadoshima J, 2018 [28]                                             | 7               | WNT5A     | P41221     | Lee SH and Choi JH, 2018 [16]; Cho KI et al, 2018 [3]                                                                             | 1               |
| MAP2K7    | O14733     | Nakamura M and Sadoshima J, 2018 [28]                                             | 7               | WNT5B     | Q9H1J7     | Lee SH and Choi JH, 2018 [16]; Cho KI et al, 2018 [3]                                                                             | 1               |

a)

|         | D.7 |     | D.14 |     |
|---------|-----|-----|------|-----|
|         | C   | Ost | C    | Ost |
| 250 kDa |     |     |      |     |
| 150 kDa |     |     |      |     |
| 100 kDa |     |     |      |     |
| 75 kDa  |     |     |      |     |
| 50 kDa  |     |     |      |     |
| 37 kDa  |     |     |      |     |

b)

|         | Control |  | Severe |  | Control |  | Severe |  | Control |  | Severe |  |
|---------|---------|--|--------|--|---------|--|--------|--|---------|--|--------|--|
| 250 kDa |         |  |        |  |         |  |        |  |         |  |        |  |
| 150 kDa |         |  |        |  |         |  |        |  |         |  |        |  |
| 100 kDa |         |  |        |  |         |  |        |  |         |  |        |  |
| 75 kDa  |         |  |        |  |         |  |        |  |         |  |        |  |
| 50 kDa  |         |  |        |  |         |  |        |  |         |  |        |  |
| 37 kDa  |         |  |        |  |         |  |        |  |         |  |        |  |

c)

|         | Control |  | Severe |  | Control |  | Severe |  | Control |  | Severe |  |
|---------|---------|--|--------|--|---------|--|--------|--|---------|--|--------|--|
| 250 kDa |         |  |        |  |         |  |        |  |         |  |        |  |
| 150 kDa |         |  |        |  |         |  |        |  |         |  |        |  |
| 100 kDa |         |  |        |  |         |  |        |  |         |  |        |  |
| 75 kDa  |         |  |        |  |         |  |        |  |         |  |        |  |
| 50 kDa  |         |  |        |  |         |  |        |  |         |  |        |  |
| 37 kDa  |         |  |        |  |         |  |        |  |         |  |        |  |
